# Supplementary material for: Diabetes and infectious disease mortality in Mexico City
Source: PubMed Central journal article supplement (PMC10008442; doi:10.1136/bmjdrc-2022-003199), 2023-03-08
Supplement: bmjdrc-2022-003199supp001.pdf [file bmjdrc-2022-003199supp001.pdf]

# Diabetes and infectious disease mortality in Mexico City

## Online Supplemental Material, Table of Contents

| <b>Supplementary tables</b>                                                                                                                                | <b>Page</b> |
|------------------------------------------------------------------------------------------------------------------------------------------------------------|-------------|
| Table S1: Infectious disease endpoint ICD-10 codes and number of deaths at age-at-risk 35-74 years                                                         | 2           |
| Table S2: Baseline characteristics of 8379 participants aged 75-84 years at recruitment                                                                    | 3           |
| Table S3: Infectious diseases mortality attributable to undiagnosed or previously-diagnosed diabetes at ages 35-74 years                                   | 4           |
| <br>                                                                                                                                                       |             |
| <b>Supplementary figures</b>                                                                                                                               |             |
| Figure S1: Prevalence of previously-diagnosed diabetes, by age                                                                                             | 5           |
| Figure S2: Relevance of previously-diagnosed diabetes to mortality from infectious causes at ages 35-74 years                                              | 6           |
| Figure S3: Relevance of previously-diagnosed diabetes to mortality from infectious causes at ages 35-74 years, by sex                                      | 7           |
| Figure S4: Relevance of previously-diagnosed diabetes to mortality from infectious causes at ages 35-84 years, by age                                      | 8           |
| Figure S5: Relevance of previously-diagnosed and undiagnosed diabetes to mortality from infectious causes at ages 35–74 years, by duration of diabetes     | 9           |
| Figure S6: Relevance of baseline HbA1c to mortality from any infectious cause among participants without previously-diagnosed diabetes at ages 35–74 years | 10          |
| Figure S7: Relevance of baseline HbA1c to mortality from infectious causes among participants without previously-diagnosed diabetes at ages 35–74 years    | 11          |

**Table S1: Infectious disease endpoint ICD-10 codes and number of deaths at age-at-risk 35-74 years**

| <b>Infectious disease endpoint</b>      | <b>ICD-10 codes (number of such deaths recorded by 01 Jan 2021)</b>                                                                                                                                                                                                                                                                                                                                                                                                                                                                                                                                                                                                                                                      |
|-----------------------------------------|--------------------------------------------------------------------------------------------------------------------------------------------------------------------------------------------------------------------------------------------------------------------------------------------------------------------------------------------------------------------------------------------------------------------------------------------------------------------------------------------------------------------------------------------------------------------------------------------------------------------------------------------------------------------------------------------------------------------------|
| <b>Respiratory</b>                      |                                                                                                                                                                                                                                                                                                                                                                                                                                                                                                                                                                                                                                                                                                                          |
| Pneumonia                               | J12.9 (4), J15.1 (3), J15.7 (1), J15.9 (29), J18.0 (49), J18.1 (29), J18.2 (2), J18.8 (1), J18.9 (535)                                                                                                                                                                                                                                                                                                                                                                                                                                                                                                                                                                                                                   |
| COVID                                   | U07.1 (225), U07.2 (203)                                                                                                                                                                                                                                                                                                                                                                                                                                                                                                                                                                                                                                                                                                 |
| Other                                   | A16.9 (2), B44.1 (1), J06.9 (1), J09 (2), J10.0 (2), J11.1 (1), J20.9 (3), J22.X (19), J34.8 (1), J44.0 (77), J44.1 (2), J85.0 (1), J85.2 (1), J86.9 (4)                                                                                                                                                                                                                                                                                                                                                                                                                                                                                                                                                                 |
| <b>Urinary tract</b>                    | N10.X (1), N11.9 (1), N15.1 (10), N30.0 (1), N30.9 (1), N39.0 (190), N49.8 (6), N49.9 (1)                                                                                                                                                                                                                                                                                                                                                                                                                                                                                                                                                                                                                                |
| <b>Septicemia</b>                       | A41.5 (1), A41.9 (174), A48.3 (1)                                                                                                                                                                                                                                                                                                                                                                                                                                                                                                                                                                                                                                                                                        |
| <b>Gastrointestinal</b>                 | A04.7 (2), A06.0 (1), A09.0 (17), A09.9 (29), A09.X (11), B69.0 (2), K05.2 (1), K35.2 (4), K35.3 (3), K35.8 (4), K35.9 (2), K57.2 (2), K57.8 (7), K57.9 (10), K61.0 (3), K61.1 (1), K61.2 (1), K63.0 (1), K65.0 (19), K65.8 (1), K65.9 (50), K75.0 (12), K83.0 (17), K93.1 (1)                                                                                                                                                                                                                                                                                                                                                                                                                                           |
| <b>Skin, bone and connective tissue</b> | <u>Infections of the skin and subcutaneous tissue:</u> L02.1 (2), L02.2 (6), L02.3 (2), L02.4 (1), L03.1 (4), L03.8 (1), L03.9 (4), L08.9 (30), L89.9 (6), L89.X (4), L90.5 (1), L98.4 (7)<br><u>Infections of bone and connective tissue:</u> M00.9 (2), M60.0 (2), M72.5 (1), M72.6 (11), M79.8 (22), M86.9 (3)                                                                                                                                                                                                                                                                                                                                                                                                        |
| <b>Other</b>                            | <u>Tuberculosis:</u> A16.2 (9), A16.5 (1), A17.0 (1), A18.0 (1), A18.1 (1), A18.2 (1), A18.3 (1), A19.9 (3)<br><u>Infections of central nervous system:</u> A81.0 (2), A86.X (2), G00.9 (3), G03.9 (3), G04.2 (1), G04.9 (7), G06.0 (3)<br><u>Viral hepatitis:</u> B16.9 (2), B17.1 (22), B18.1 (2), B18.2 (7), B18.9 (1), B19.0 (2), B19.9 (2),<br><u>HIV:</u> B20.0 (1), B20.1 (2), B20.6 (2), B20.7 (3), B20.8 (7), B21.0 (1), B21.2 (1), B21.8 (1), B22.7 (2), B23.8 (4), B24.X (5)<br><u>Infections of circulatory system:</u> I01.8 (1), I30.1 (1), I33.0 (6), I38.X (7),<br><u>Other:</u> A49.8 (1), B46.5 (2), B90.9 (1), B94.8 (2), B99.X (1), H44.0 (1), J39.1 (1), N71.9 (1), N73.9 (2), N76.4 (1), Y40.5 (1) |
| <b>All</b>                              | All ICD-10 codes listed above                                                                                                                                                                                                                                                                                                                                                                                                                                                                                                                                                                                                                                                                                            |

At ages 75-84 years there were 809 deaths from respiratory infection, 155 from urinary tract infection, 95 from septicemia, 134 from gastrointestinal infection, 72 from skin, bone and connective tissue infections and 27 deaths from other infections.

**Table S2: Baseline characteristics of 8379 participants aged 75-84 years at recruitment**

|                                       | No diabetes | Diabetes    |                      | Previously-diagnosed diabetes by duration, years |             |             | Previously-diagnosed diabetes by HbA1c, % |             |             | Overall     |
|---------------------------------------|-------------|-------------|----------------------|--------------------------------------------------|-------------|-------------|-------------------------------------------|-------------|-------------|-------------|
|                                       |             | Undiagnosed | Previously-diagnosed | <5                                               | 5 to <10    | 10+         | <9                                        | 9 to <11    | 11+         |             |
| No. of participants                   | 6026        | 548         | 1805                 | 239                                              | 670         | 896         | 1236                                      | 359         | 210         | 8379        |
| Age, sex and socioeconomic factors    |             |             |                      |                                                  |             |             |                                           |             |             |             |
| Age, years                            | 79 (3)      | 78 (3)      | 78 (3)               | 78 (3)                                           | 78 (3)      | 78 (3)      | 79 (3)                                    | 78 (3)      | 78 (3)      | 79 (3)      |
| Men                                   | 39          | 37          | 33                   | 31                                               | 34          | 32          | 32                                        | 35          | 32          | 37          |
| Resident of Coyoacán                  | 35          | 28          | 31                   | 24                                               | 31          | 32          | 31                                        | 26          | 34          | 34          |
| Resident of Iztapalapa                | 65          | 72          | 69                   | 76                                               | 69          | 68          | 69                                        | 74          | 66          | 66          |
| University or college educated        | 4           | 4           | 3                    | 3                                                | 3           | 3           | 3                                         | 2           | 2           | 4           |
| Lifestyle factors                     |             |             |                      |                                                  |             |             |                                           |             |             |             |
| Current smoker                        | 13          | 13          | 9                    | 11                                               | 9           | 9           | 9                                         | 11          | 9           | 12          |
| Current alcohol drinker               | 51          | 46          | 43                   | 44                                               | 45          | 41          | 42                                        | 47          | 41          | 49          |
| Physical activity 1+ times/week       | 21          | 17          | 19                   | 17                                               | 20          | 19          | 20                                        | 20          | 14          | 20          |
| Anthropometry                         |             |             |                      |                                                  |             |             |                                           |             |             |             |
| Height, cm                            | 152 (9)     | 152 (9)     | 152 (9)              | 150 (9)                                          | 152 (9)     | 152 (9)     | 152 (9)                                   | 152 (9)     | 152 (9)     | 152 (9)     |
| Weight, kg                            | 64 (12)     | 68 (12)     | 64 (12)              | 65 (12)                                          | 66 (9)      | 63 (10)     | 64 (12)                                   | 65 (12)     | 62 (11)     | 64 (12)     |
| BMI, kg/m <sup>2</sup>                | 27.6 (4.6)  | 29.3 (4.6)  | 27.8 (4.6)           | 28.6 (4.5)                                       | 28.3 (4.5)  | 27.3 (4.5)  | 28.0 (4.6)                                | 27.8 (4.4)  | 26.8 (4.2)  | 27.7 (4.6)  |
| Waist circumference, cm               | 96 (11)     | 101 (10)    | 98 (11)              | 98 (11)                                          | 99 (11)     | 97 (11)     | 98 (11)                                   | 98 (11)     | 95 (11)     | 97 (11)     |
| Waist-to-hip ratio                    | 0.94 (0.07) | 0.95 (0.07) | 0.94 (0.07)          | 0.94 (0.07)                                      | 0.94 (0.07) | 0.94 (0.07) | 0.94 (0.07)                               | 0.94 (0.07) | 0.94 (0.07) | 0.94 (0.07) |
| HbA1c, %                              | 5.6 (0.4)   | 7.9 (1.8)   | 8.2 (2.1)            | 7.7 (2.1)                                        | 8.1 (2.2)   | 8.4 (2.1)   | 7.0 (1.0)                                 | 9.9 (0.6)   | 12.4 (1.3)  | 6.3 (1.6)   |
| Duration of diabetes diagnosis, years |             |             | 14 (9)               | 2 (1)                                            | 8(1)        | 22 (7)      | 13 (9)                                    | 15 (9)      | 15 (9)      |             |
| Age at diabetes diagnosis, years      |             |             | 64 (9)               | 76 (3)                                           | 70 (3)      | 57 (7)      | 65 (9)                                    | 63 (9)      | 63 (10)     |             |
| Glucose-lowering medication           |             |             |                      |                                                  |             |             |                                           |             |             |             |
| Sulphonylurea                         |             |             | 69                   | 61                                               | 73          | 69          | 68                                        | 69          | 75          |             |
| Biguanide                             |             |             | 16                   | 13                                               | 14          | 18          | 15                                        | 16          | 19          |             |
| Insulin                               |             |             | 8                    | 2                                                | 3           | 13          | 6                                         | 15          | 10          |             |
| Other                                 |             |             | 1                    | 1                                                | 2           | 1           | 2                                         | 1           | 1           |             |
| Any                                   |             |             | 82                   | 68                                               | 81          | 86          | 79                                        | 87          | 87          |             |
| Mean (SD) or %                        |             |             |                      |                                                  |             |             |                                           |             |             |             |

**Table S3: Infectious diseases mortality attributable to undiagnosed or previously-diagnosed diabetes at ages 35-74 years**

| Infectious disease                         | Number of deaths |                      |                               |             | Death RR (95% CI) vs. no diabetes |                      |                               |             | Attributable mortality, % |                               |             |                |
|--------------------------------------------|------------------|----------------------|-------------------------------|-------------|-----------------------------------|----------------------|-------------------------------|-------------|---------------------------|-------------------------------|-------------|----------------|
|                                            | No diabetes      | Undiagnosed diabetes | Previously-diagnosed diabetes |             | No diabetes                       | Undiagnosed diabetes | Previously-diagnosed diabetes |             | Undiagnosed diabetes      | Previously-diagnosed diabetes |             | Total diabetes |
|                                            |                  |                      | HbA1c <9.0%                   | HbA1c ≥9.0% |                                   |                      | HbA1c <9.0%                   | HbA1c ≥9.0% |                           | HbA1c <9.0%                   | HbA1c ≥9.0% |                |
| Urinary tract infection                    | 78               | 28                   | 31                            | 74          | 1.00                              | 5.67                 | 5.73                          | 13.37       | 11                        | 12                            | 32          | 56             |
| Skin, bone and connective tissue infection | 38               | 16                   | 12                            | 43          | 1.00                              | 5.43                 | 3.86                          | 14.70       | 12                        | 8                             | 37          | 57             |
| Septicemia                                 | 69               | 19                   | 28                            | 60          | 1.00                              | 4.26                 | 5.38                          | 11.16       | 8                         | 13                            | 31          | 52             |
| Gastrointestinal infection                 | 112              | 20                   | 22                            | 47          | 1.00                              | 2.36                 | 2.48                          | 5.38        | 6                         | 7                             | 19          | 31             |
| Respiratory infection                      | 744              | 113                  | 149                           | 192         | 1.00                              | 2.35                 | 3.14                          | 4.16        | 5                         | 8                             | 12          | 26             |
| Other infections                           | 95               | 6                    | 12                            | 22          | 1.00                              | 0.99                 | 1.50                          | 2.77        | 0                         | 3                             | 10          | 13             |
| <b>All infections</b>                      | <b>1136</b>      | <b>202</b>           | <b>254</b>                    | <b>438</b>  | <b>1.00</b>                       | <b>2.69</b>          | <b>3.25</b>                   | <b>5.69</b> | <b>6</b>                  | <b>9</b>                      | <b>18</b>   | <b>33</b>      |

Rate ratios (RRs) are stratified by age-at-risk and sex, and adjusted for district, educational level, smoking status, alcohol drinking, height, weight, waist circumference and hip circumference. Attributable mortality calculated as number of deaths  $\times$  (RR-1)/RR, where RR is the infectious disease death RR for that group relative to those without diabetes.

**Figure S1: Prevalence of previously-diagnosed diabetes, by age**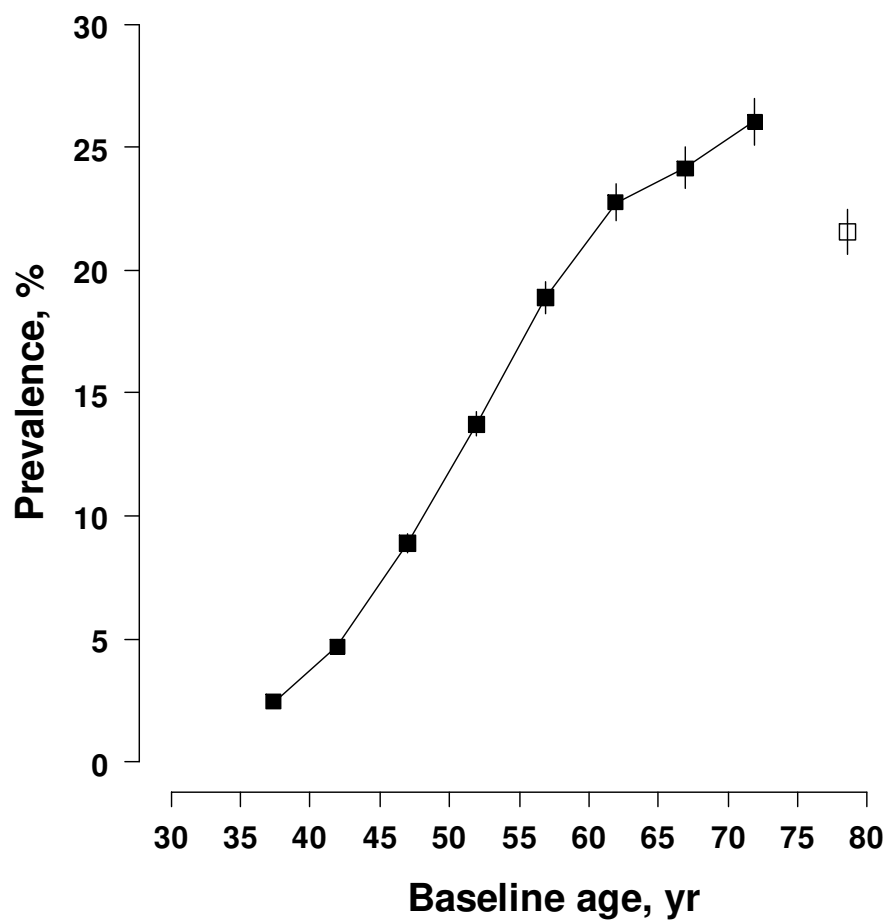

The unfilled square represents diabetes prevalence at  $\geq 75$  years. Error bars represent 95% confidence intervals.

**Figure S2: Relevance of previously-diagnosed diabetes to mortality from infectious causes at ages 35-74 years**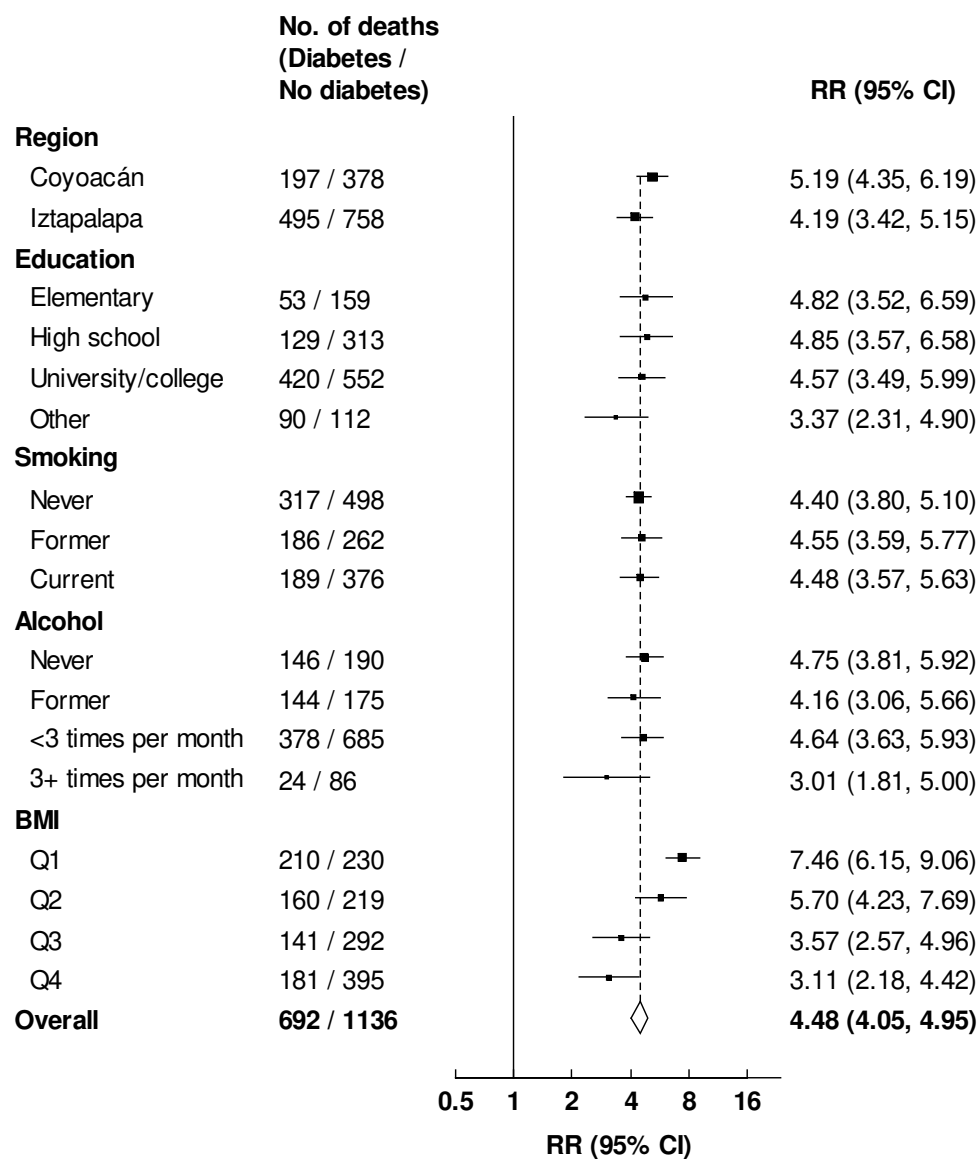

Mortality rate ratios (RRs) for deaths due to infectious diseases at ages 35–74 years, for patients with previously-diagnosed diabetes versus those with no diabetes. RRs are stratified by age-at-risk and sex, and adjusted for district, educational level, smoking status, alcohol drinking, height, weight, waist circumference and hip circumference. The size of each square is proportional to the amount of data available. Horizontal lines represent 95% confidence intervals.

**Figure S3: Relevance of previously-diagnosed diabetes to mortality from infectious causes at ages 35-74 years, by sex**

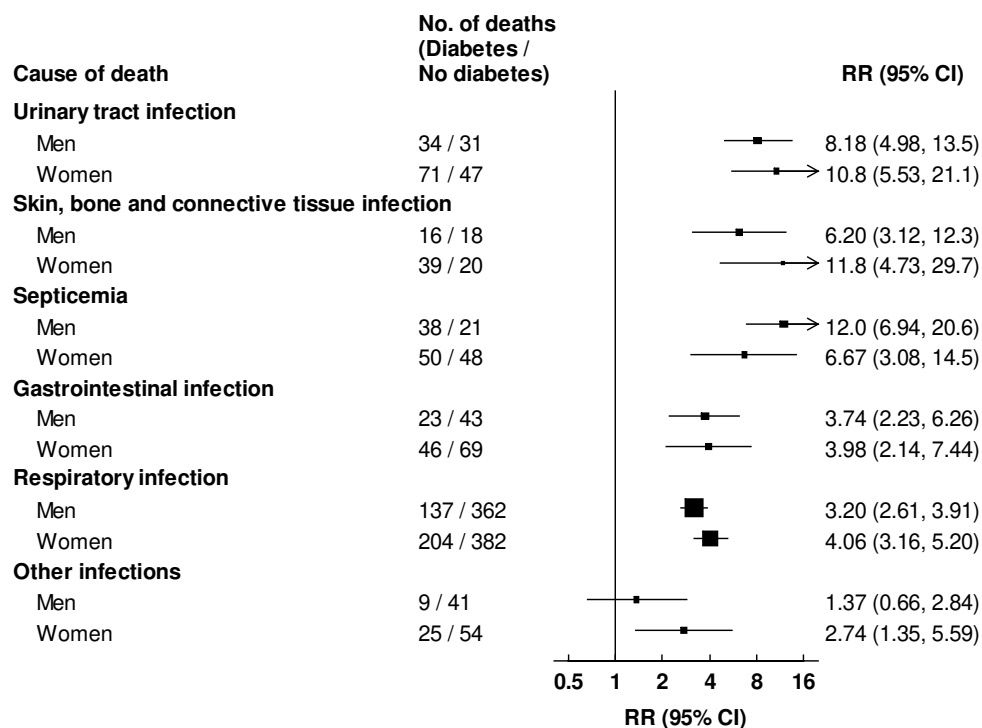

Mortality rate ratios (RRs) for deaths due to infectious diseases at ages 35–74 years, for patients with previously-diagnosed diabetes versus those with no diabetes. RRs are stratified by age-at-risk, and adjusted for district, educational level, smoking status, alcohol drinking, height, weight, waist circumference and hip circumference. The size of each square is proportional to the amount of data available. Horizontal lines represent 95% confidence intervals.

**Figure S4: Relevance of previously-diagnosed diabetes to mortality from infectious causes at ages 35-84 years, by age**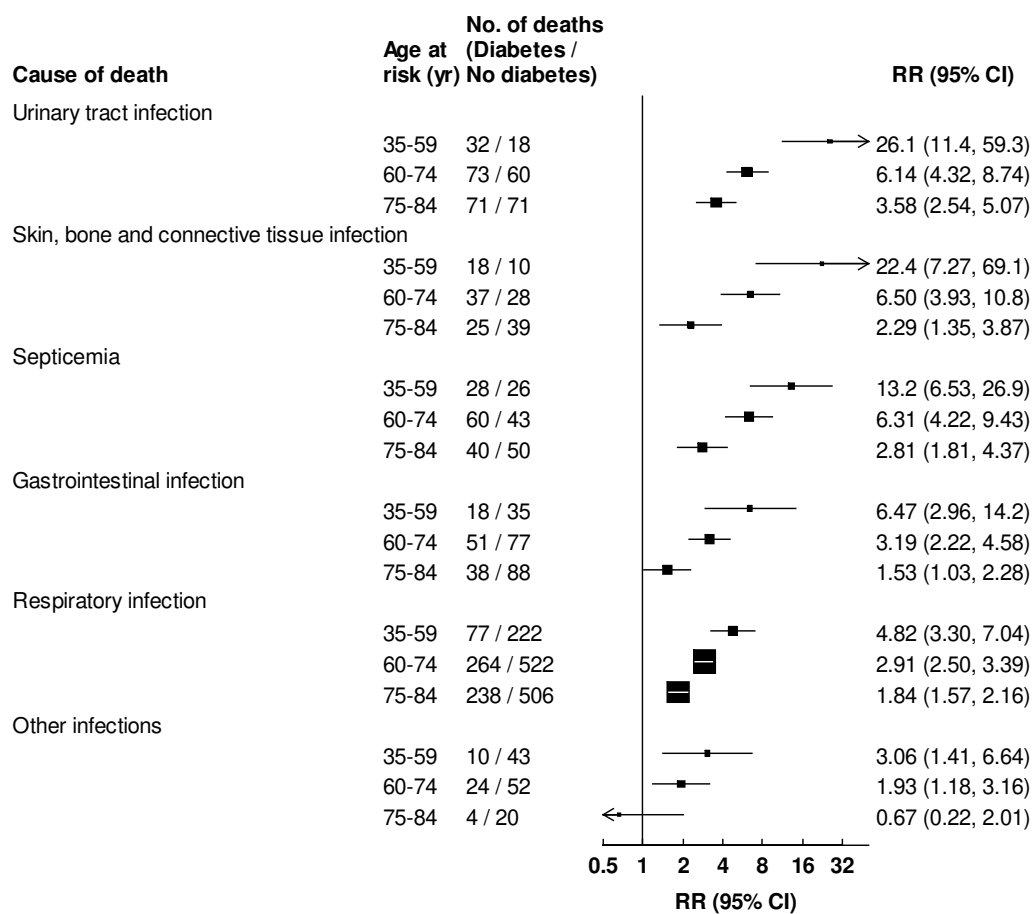

Mortality rate ratios (RRs) for deaths due to infectious diseases at ages 35-84 years, for patients with previously-diagnosed diabetes versus those with no diabetes. RRs are stratified by age-at-risk and sex, and adjusted for district, educational level, smoking status, alcohol drinking, height, weight, waist circumference and hip circumference. The size of each square is proportional to the amount of data available. Horizontal lines represent 95% confidence intervals.



**Figure S5: Relevance of previously-diagnosed and undiagnosed diabetes to mortality from infectious causes at ages 35–74 years, by duration of diabetes**

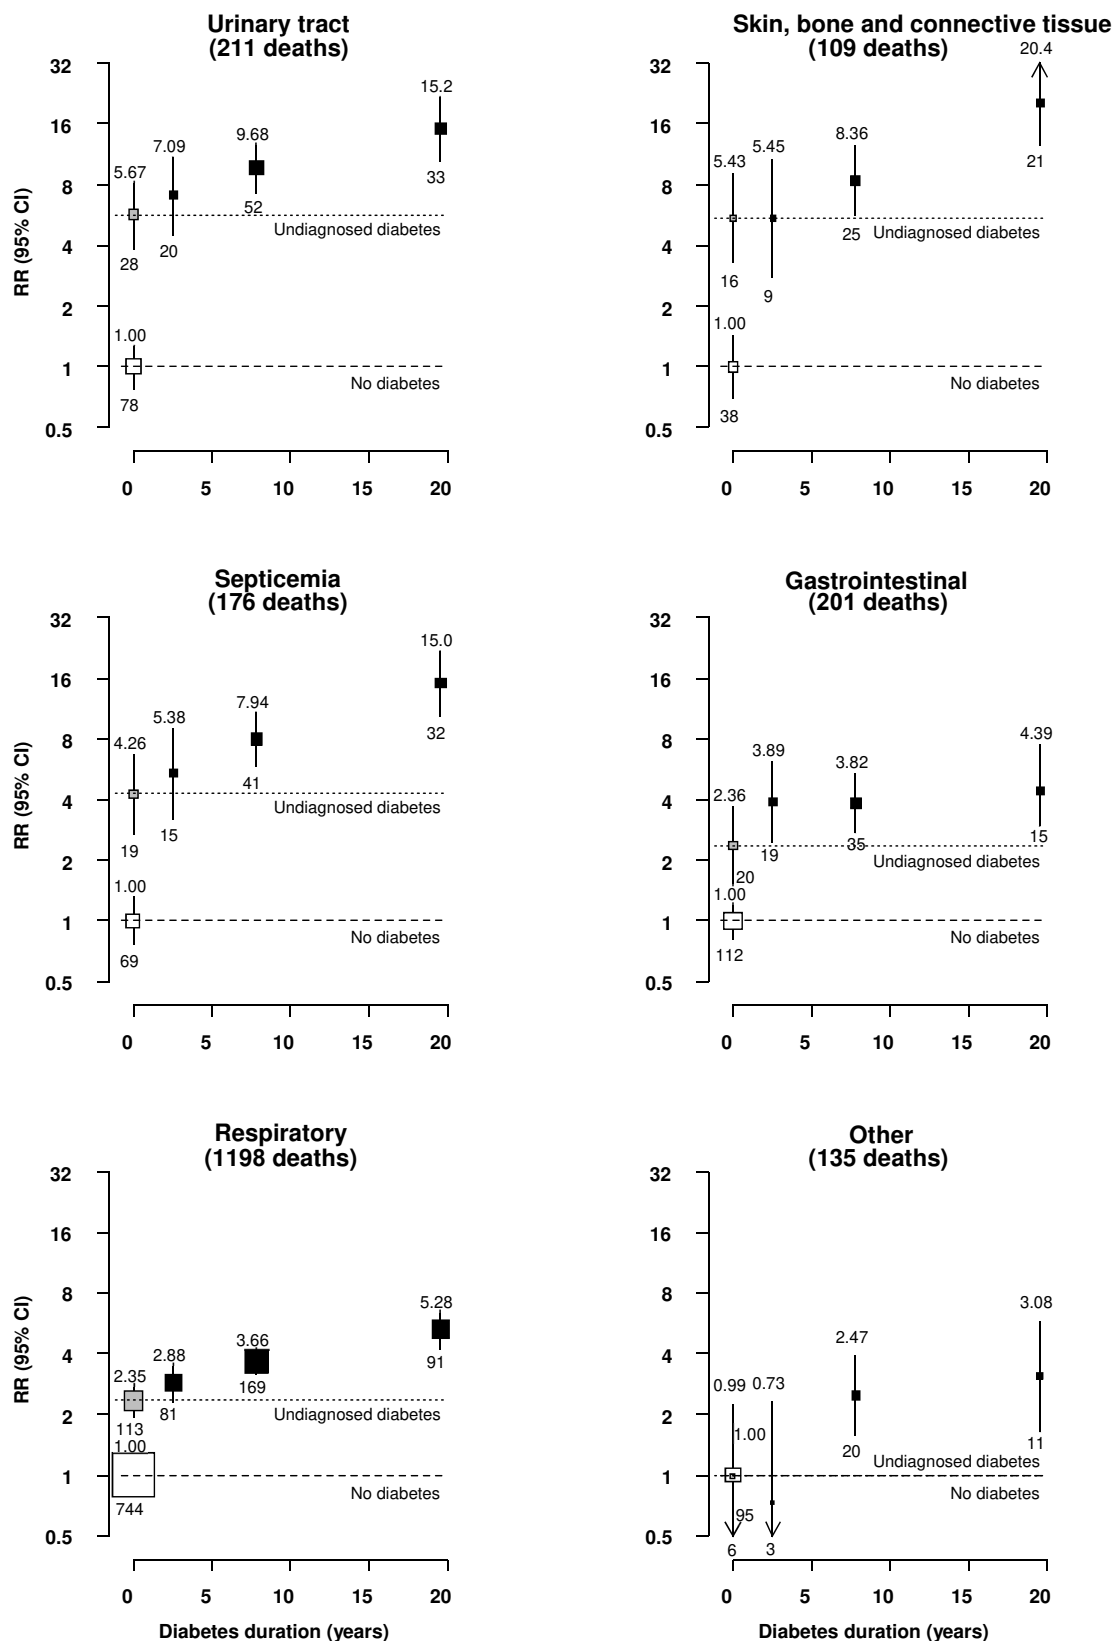

Rate ratios (RRs) are stratified by age-at-risk and sex, and adjusted for district, educational level, smoking status, alcohol drinking, height, weight, waist circumference and hip circumference. Analyses are additionally adjusted for HbA1c among participants with previously-diagnosed diabetes. Unfilled squares represent no diabetes. Grey squares represent undiagnosed diabetes. Black squares represent previously-diagnosed diabetes. The numbers above the squares are the RRs and the numbers below the squares are the number of deaths in that group. The size of each square is proportional to the amount of data available. The error bars represent 95% confidence intervals.

**Figure S6: Relevance of baseline HbA1c to mortality from any infectious cause among participants without previously-diagnosed diabetes at ages 35–74 years**

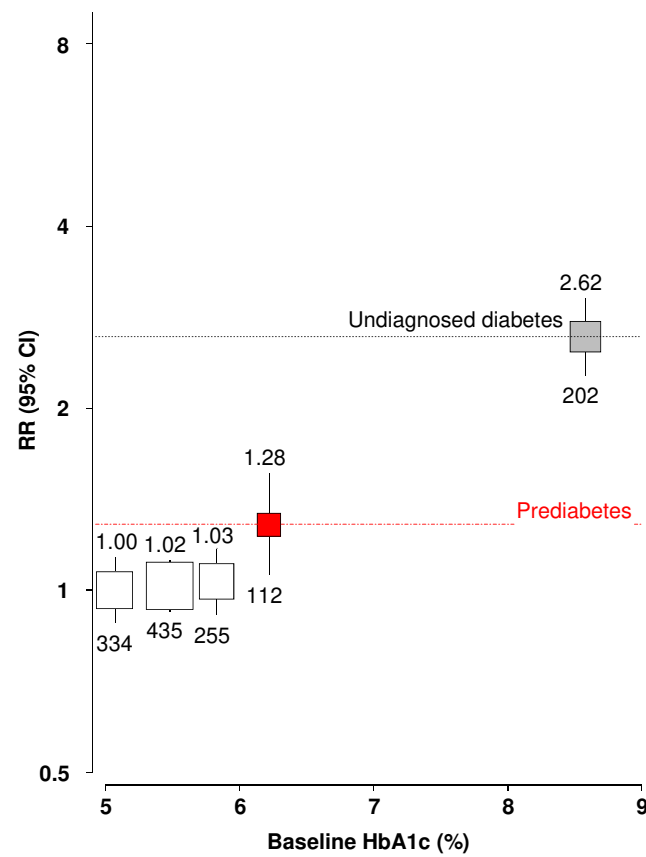

Rate ratios (RRs) are stratified by age-at-risk and sex, and adjusted for district, educational level, smoking status, alcohol drinking, height, weight, waist circumference and hip circumference. Unfilled squares represent no diabetes. Red squares represent prediabetes. Grey squares represent undiagnosed diabetes. The numbers above the squares are the RRs and the numbers below the squares are the number of deaths in that group. The size of each square is proportional to the amount of data available. The error bars represent 95% confidence intervals.

**Figure S7: Relevance of baseline HbA1c to mortality from infectious causes among participants without previously-diagnosed diabetes at ages 35–74 years**

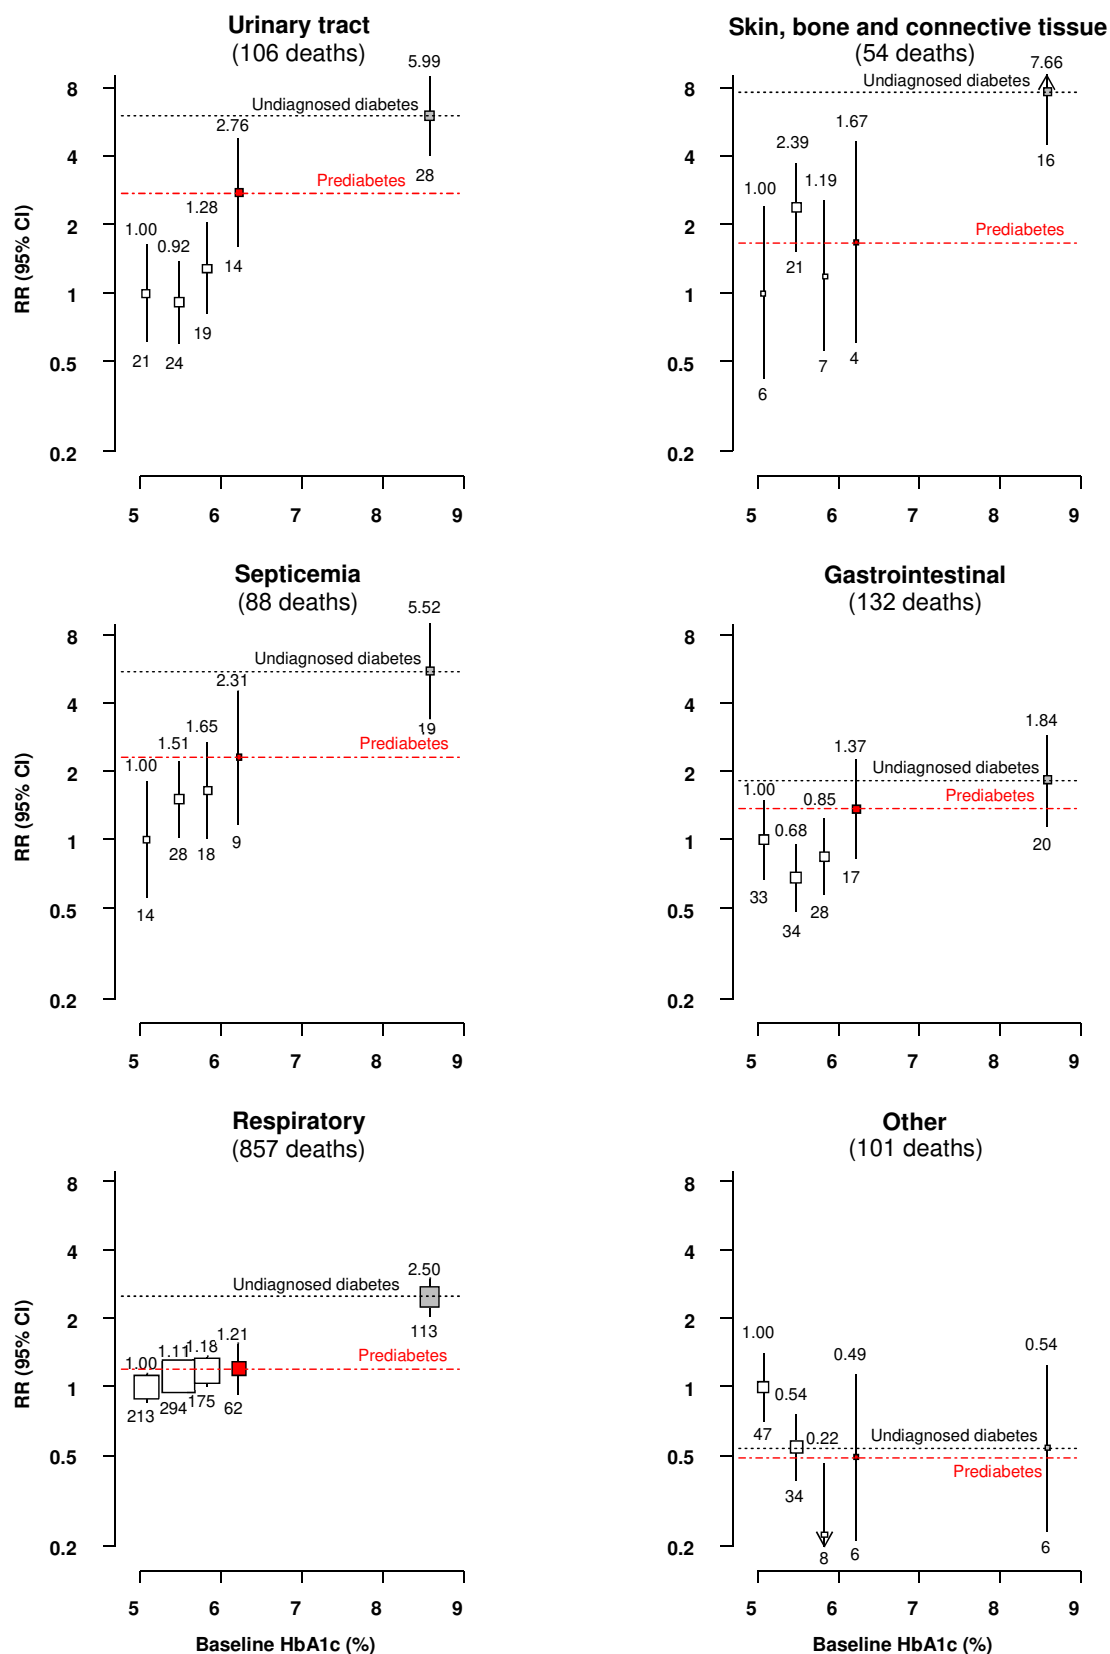

Rate ratios (RRs) are stratified by age-at-risk and sex, and adjusted for district, educational level, smoking status, alcohol drinking, height, weight, waist circumference and hip circumference. Unfilled squares represent no diabetes. Red squares represent prediabetes. Grey squares represent undiagnosed diabetes. The numbers above or below the squares are the RRs and the numbers below the squares are the number of deaths in that group. The size of each square is proportional to the amount of data available. The error bars represent 95% confidence intervals.
